# Supplementary material for: MiR-29b-3p promotes particulate matter-induced inflammatory responses by regulating the C1QTNF6/AMPK pathway
Source: publisher site journal article supplement (doi:10.18632/aging.102672), 2020-01-18
Supplement: Supplementary file [file aging-v12i2-102672-supplementary-material-SD1.pdf]

## SUPPLEMENTARY FIGURE

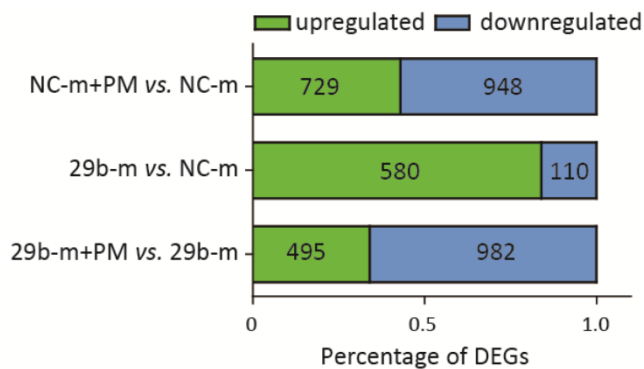

**Supplementary Figure 1.** The number of differentially expressed genes was identified in NC-m vs. 29b-m group, NC-m + PM vs. 29b-m + PM group, and NC-m vs. NC-m + PM group.

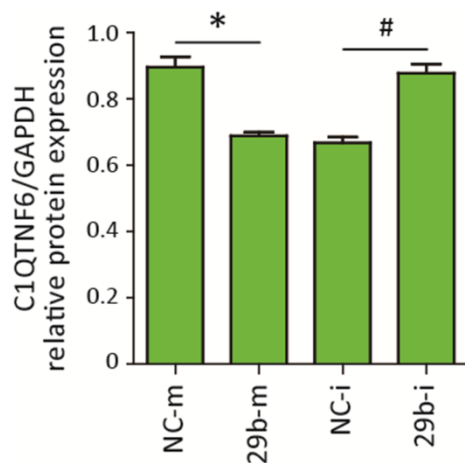

**Supplementary Figure 2.** The optical densities of protein bands for Figure 4F. Values were shown as mean ± SEM; \*, P<0.05, compared with the NC-m group; #, P<0.05, compared with the NC-i group; n=3.

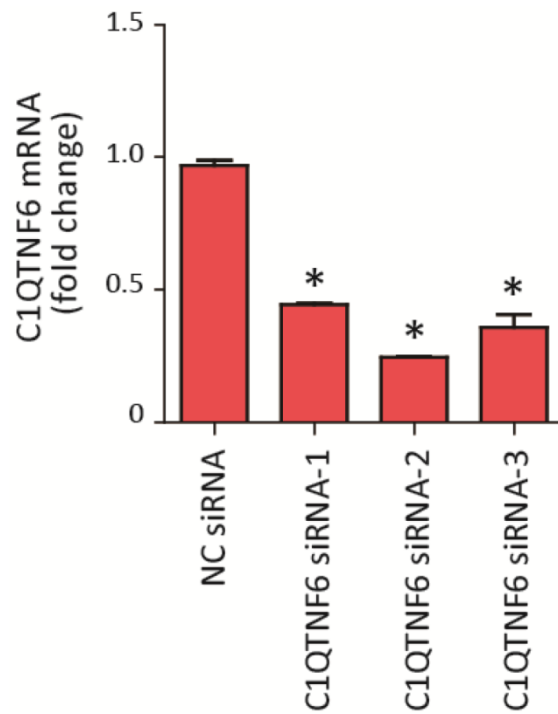

**Supplementary Figure 3. The optimum C1QTNF6 siRNA was identified according to the inhibition efficiency of three designed siRNAs using RT-PCR.** The C1QTNF6 siRNAs were transfected into HBECs and the optimum C1QTNF6 siRNA was selected using real-time PCR. Values were shown as mean  $\pm$  SEM; \*,  $P < 0.05$ , compared with the NC siRNA group;  $n = 3$ .
